# Supplementary material for: Modification and Functionalization of Zeolites for Curcumin Uptake
Source: MDPI journal article supplement (doi:10.3390/ma15186316), 2022-09-12

# Modification and Functionalization of Zeolites for Curcumin Uptake

Ewelina Musielak <sup>1</sup>, Agnieszka Feliczak-Guzik <sup>1</sup>, Mietek Jaroniec <sup>2</sup> and Izabela Nowak <sup>1,\*</sup>

<sup>1</sup> Faculty of Chemistry, Adam Mickiewicz University, Uniwersytetu Poznańskiego 8, 61-614 Poznań, Poland

<sup>2</sup> Department of Chemistry and Biochemistry, Kent State University, Kent, OH 44242, USA

\* Correspondence: nowakiza@amu.edu.pl; Tel.: +48-618291580

**Table S1.** Optimization of different parameters in the application process of curcumin to a commercial FAU-type zeolite.

| Material            | Solvent         | Amount of<br>curcumin<br>[mg] | Amount of<br>piperyne<br>[mg] | Tempe-<br>rature<br>[°C] | Mixing<br>time<br>[h] |
|---------------------|-----------------|-------------------------------|-------------------------------|--------------------------|-----------------------|
| FAU/M/CUR50         | Ethanol/Acetone | 50.00                         | -                             | RT                       | 24                    |
| FAU/M/CUR100        | Ethanol/Acetone | 100.00                        | -                             | RT                       | 24                    |
| FAU/M/CUR150        | Ethanol/Acetone | 150.00                        | -                             | RT                       | 24                    |
| FAU/E/CUR50         | Ethanol         | 50.00                         | -                             | RT                       | 24                    |
| FAU/E/CUR100        | Ethanol         | 100.00                        | -                             | RT                       | 24                    |
| FAU/E/CUR150        | Ethanol         | 150.00                        | -                             | RT                       | 24                    |
| FAU/A/CUR50         | Acetone         | 50.00                         | -                             | RT                       | 24                    |
| FAU/A/CUR100        | Acetone         | 100.00                        | -                             | RT                       | 24                    |
| FAU/A/CUR150        | Acetone         | 150.00                        | -                             | RT                       | 24                    |
| FAU/E/CUR50/70      | Ethanol         | 50.00                         | -                             | 70                       | 24                    |
| FAU/E/CUR 50/12h    | Ethanol         | 50.00                         | -                             | RT                       | 12                    |
| FAU/E/CUR 50/36h    | Ethanol         | 50.00                         | -                             | RT                       | 36                    |
| FAU/E/CUR50/48h     | Ethanol         | 50.00                         | -                             | RT                       | 48                    |
| FAU/A/CUR50/PIP0.25 | Acetone         | 50.00                         | 0.25                          | RT                       | 24                    |
| FAU/A/CUR50/PIP0.50 | Acetone         | 50.00                         | 0.50                          | RT                       | 24                    |
| FAU/A/CUR50/PIP1.00 | Acetone         | 50.00                         | 1.00                          | RT                       | 24                    |
| FAU/A/CUR50/PIP2.00 | Acetone         | 50.00                         | 2.00                          | RT                       | 24                    |

**Table S2.** Elemental analysis of commercial FAU zeolite, hierarchical materials obtained from its base before and after curcumin application.

| <b>Material</b>                                                              | <b>%N</b> | <b>%C</b> | <b>%H</b> | <b>%S</b> |
|------------------------------------------------------------------------------|-----------|-----------|-----------|-----------|
| <b>Pure hierarchical zeolites together with initial microporous material</b> |           |           |           |           |
| <b>Commercial zeolite FAU</b>                                                | 0.12      | 0.74      | 0.35      | 0.07      |
| <b>FAU/CTABr</b>                                                             | 0.00      | 0.02      | 2.28      | 0.00      |
| <b>FAU/Lutrol</b>                                                            | 0.00      | 0.02      | 3.36      | 0.00      |
| <b>FAU/Brij</b>                                                              | 0.00      | 0.03      | 3.30      | 0.00      |
| <b>Hierarchical materials with applied curcumin and curcumin standard</b>    |           |           |           |           |
| <b>Curcumin</b>                                                              | 0.00      | 30.26     | 4.61      | 0.00      |
| <b>FAU/CUR150</b>                                                            | 0.00      | 5.69      | 2.64      | 0.00      |
| <b>FAU/CTABr/CUR150</b>                                                      | 0.00      | 17.30     | 3.24      | 0.00      |
| <b>FAU/Lutrol/CUR150</b>                                                     | 0.00      | 3.38      | 2.52      | 0.00      |
| <b>FAU/Brij/CUR150</b>                                                       | 0.00      | 5.30      | 2.81      | 0.00      |

**Table S3.** Final pH vs. initial pH for commercial materials.

| Commercial zeolite<br>FAU |                     | FAU/CTABr               |                     | FAU/Lutrol              |                     | FAU/Brij                |                     |
|---------------------------|---------------------|-------------------------|---------------------|-------------------------|---------------------|-------------------------|---------------------|
| pH <sub>initial</sub>     | pH <sub>final</sub> | pH <sub>initial</sub>   | pH <sub>final</sub> | pH <sub>initial</sub>   | pH <sub>final</sub> | pH <sub>initial</sub>   | pH <sub>final</sub> |
| 2.0                       | 4.0                 | 2.0                     | 4.0                 | 2.0                     | 3.0                 | 2.0                     | 4.0                 |
| 3.0                       | 5.0                 | 3.0                     | 4.5                 | 3.0                     | 4.0                 | 3.0                     | 4.5                 |
| 4.0                       | 5.5                 | 4.0                     | 5.0                 | 4.0                     | 5.5                 | 4.0                     | 5.0                 |
| 5.0                       | 6.0                 | 5.0                     | 5.5                 | 5.0                     | 6.0                 | 5.0                     | 5.5                 |
| 6.0                       | 6.5                 | 6.0                     | 6.0                 | 6.0                     | 7.0                 | 6.0                     | 6.0                 |
| 7.0                       | 7.0                 | 7.0                     | 6.5                 | 7.0                     | 7.0                 | 7.0                     | 6.5                 |
| 8.0                       | 8.0                 | 8.0                     | 7.0                 | 8.0                     | 8.0                 | 8.0                     | 7.0                 |
| 9.0                       | 9.0                 | 9.0                     | 8.0                 | 9.0                     | 8.5                 | 9.0                     | 8.0                 |
| 10.0                      | 10.0                | 10.0                    | 9.0                 | 10.0                    | 9.0                 | 10.0                    | 9.0                 |
| pH <sub>ZPC</sub> ~ 6.5   |                     | pH <sub>ZPC</sub> ~ 6.0 |                     | pH <sub>ZPC</sub> ~ 6.5 |                     | pH <sub>ZPC</sub> ~ 6.2 |                     |

**Figure S1.** Nitrogen adsorption/desorption isotherms for hierarchical zeolites: FAU/CTABr (A), FAU/Brij (B) and FAU/Lutrol (C) derived from FAU-type commercial zeolite. Adsorption and desorption points are represented by closed and open circles. Note that for mesopores with diameters below 4-5 nm both adsorption and desorption branches coincide.

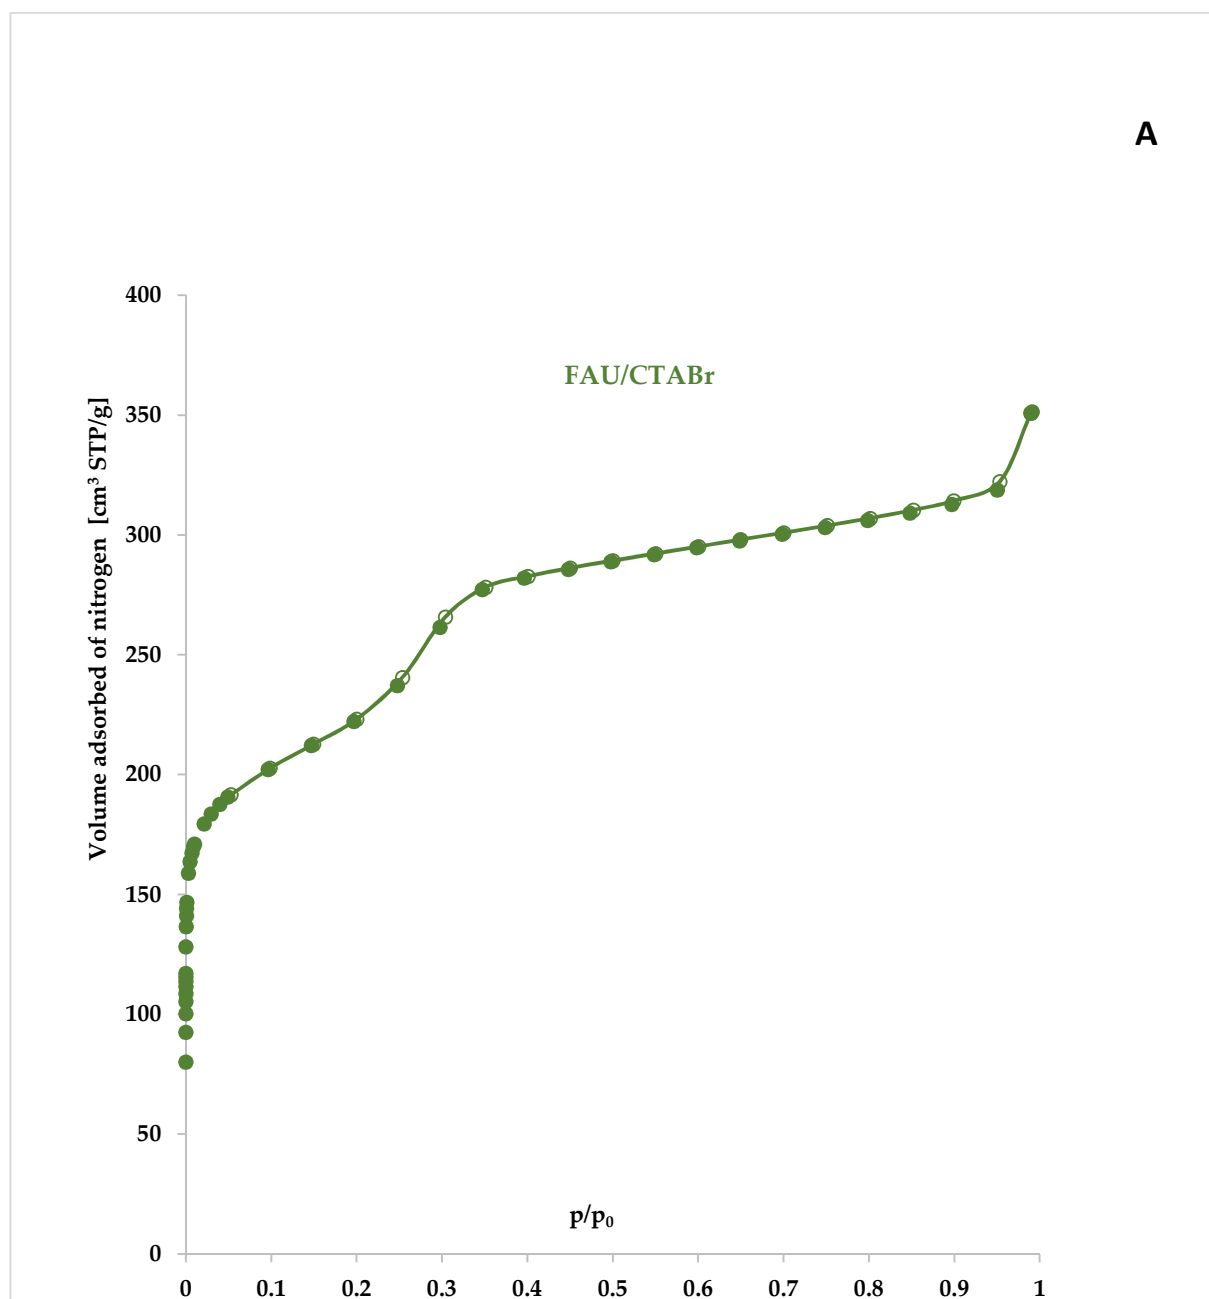

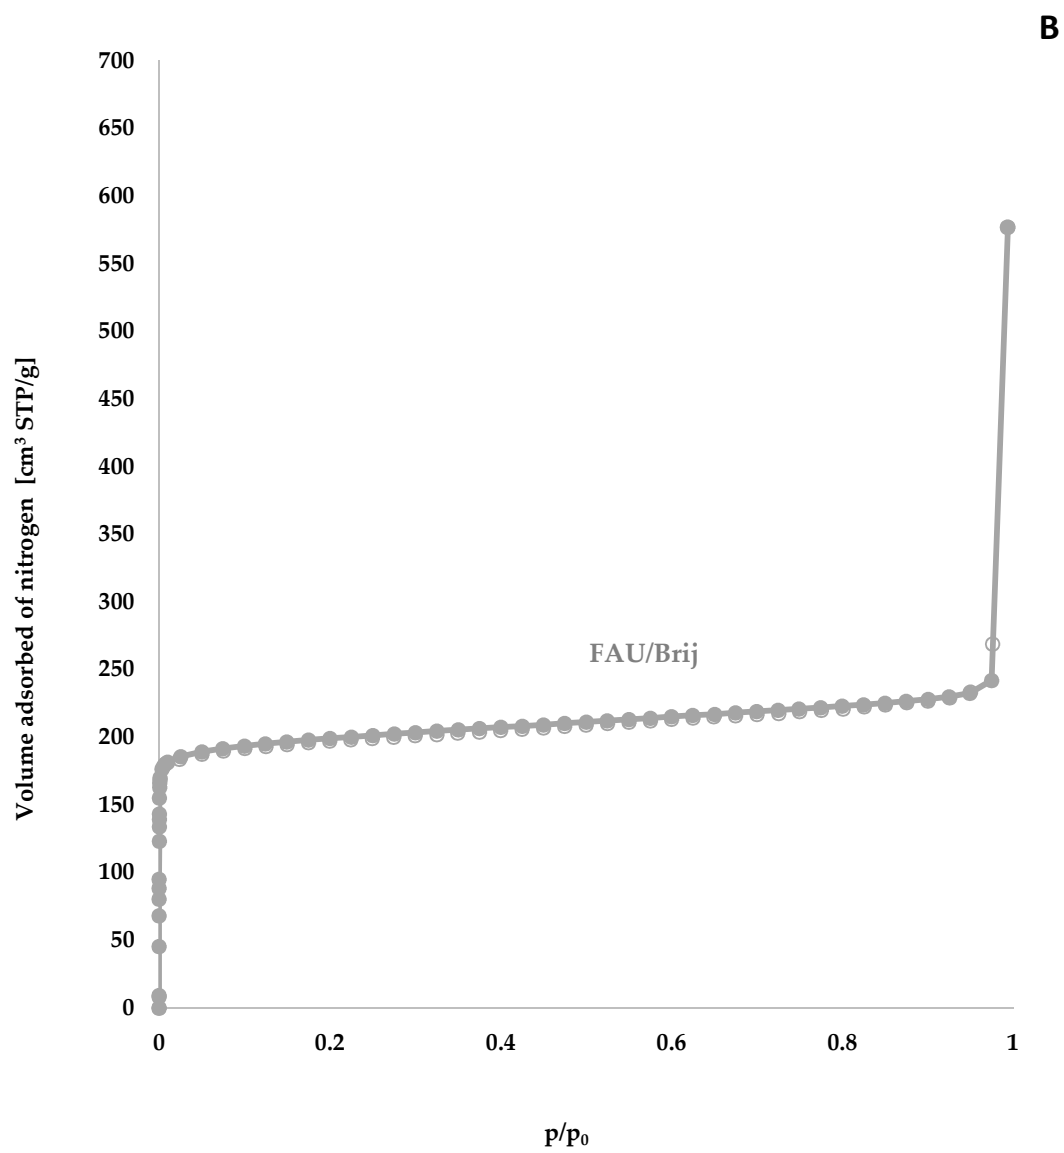

C

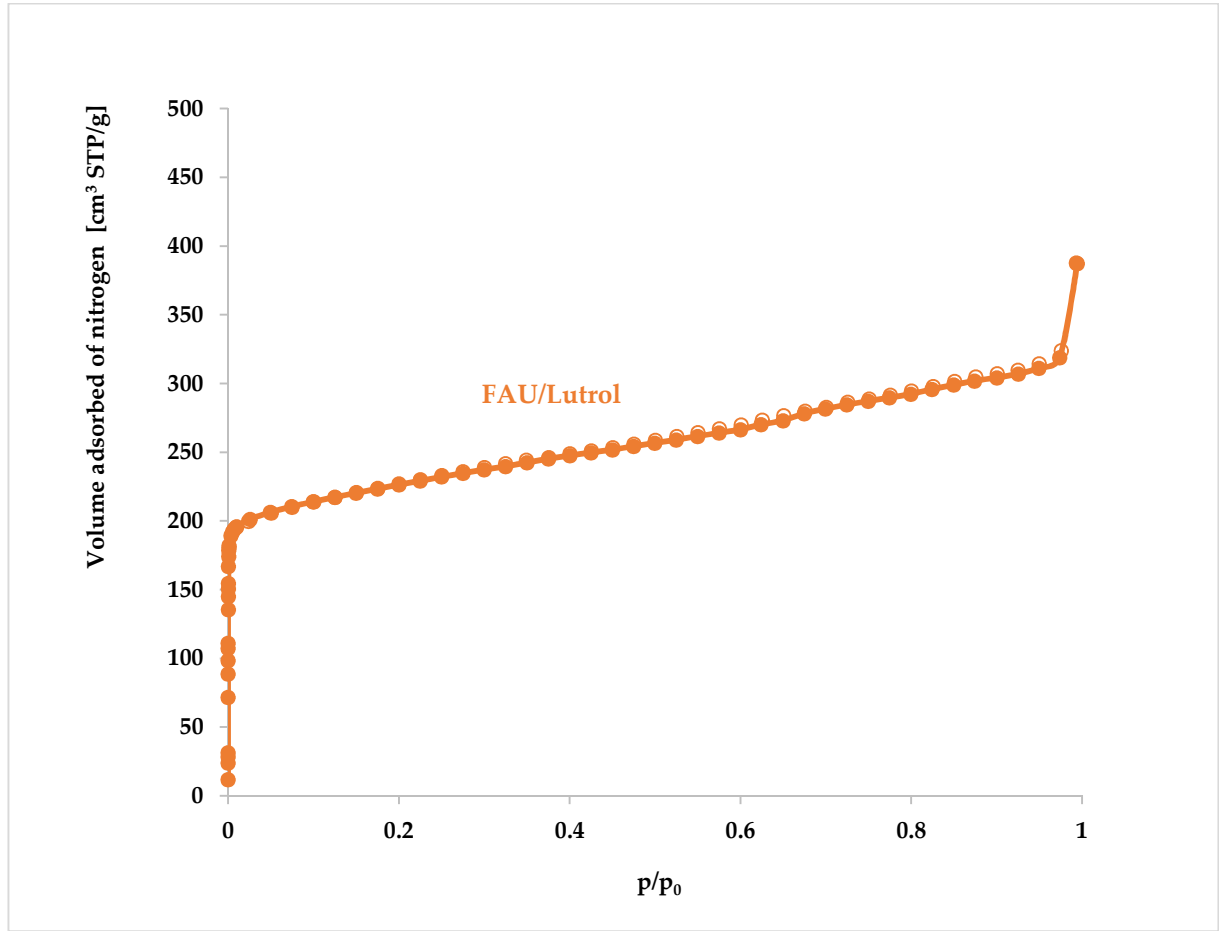

**Figure S2.** FTIR spectra in the wavenumber range from 600  $\text{cm}^{-1}$  to 4000  $\text{cm}^{-1}$  of hierarchical materials based on commercial FAU zeolite (panel A) and these materials modified with curcumin (panel B). The enlarged portion corresponding to the range from 3000  $\text{cm}^{-1}$  to 3800  $\text{cm}^{-1}$  is shown at the top of each panel.

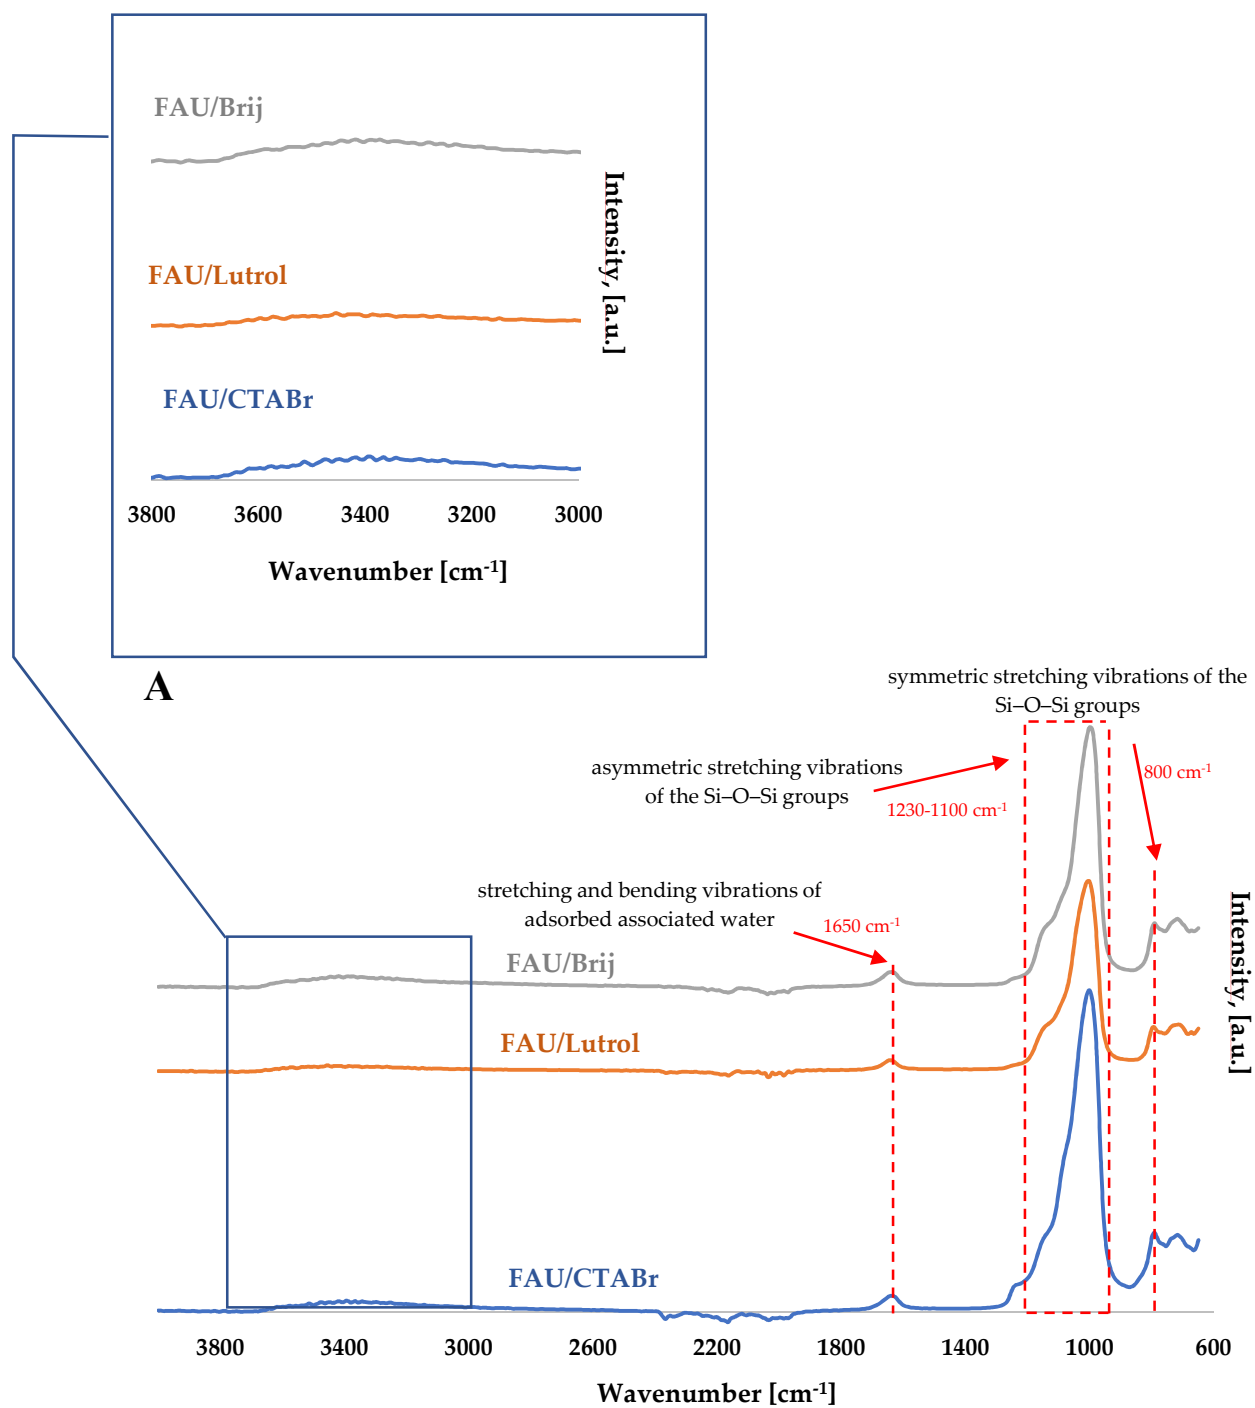

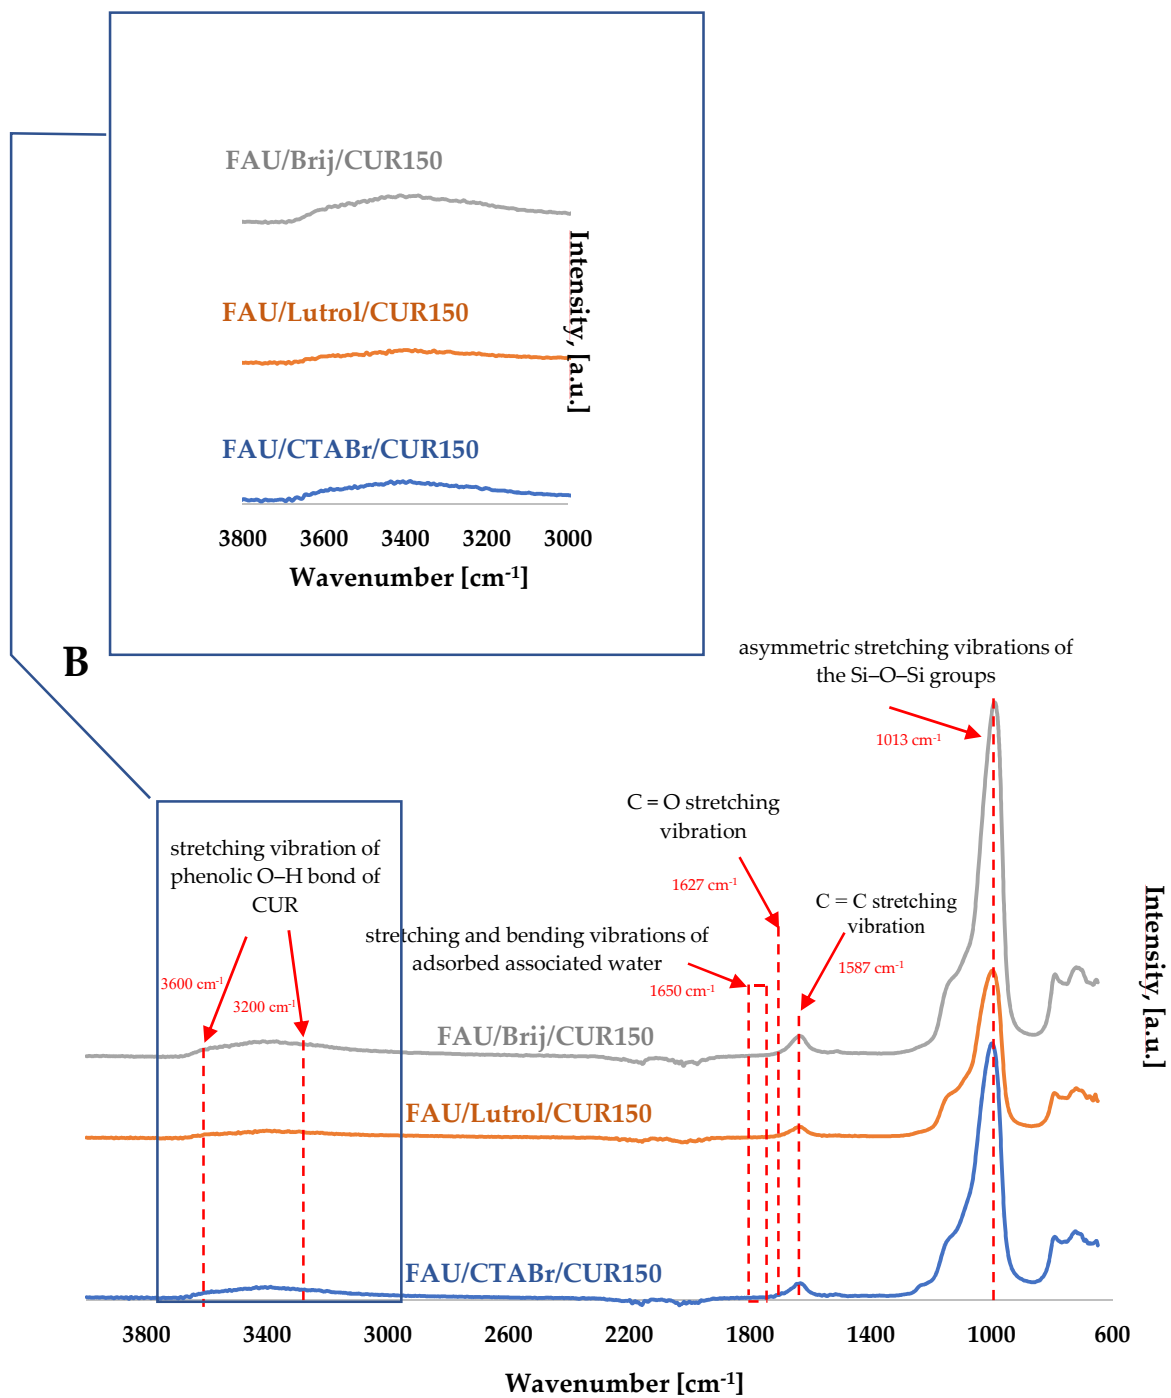



**Figure S3.** TEM images of synthesized hierarchical zeolites, at 200 nm magnification.

**Commercial zeolite FAU**

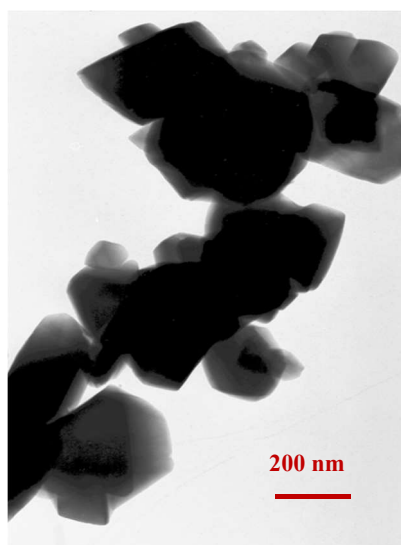

**FAU/CTABr**

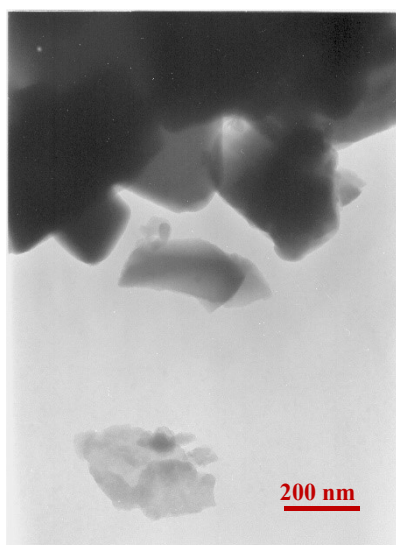

**FAU/Lutrol**

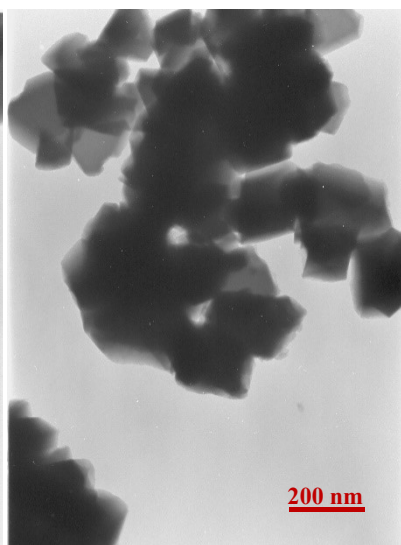

**FAU/Brij**

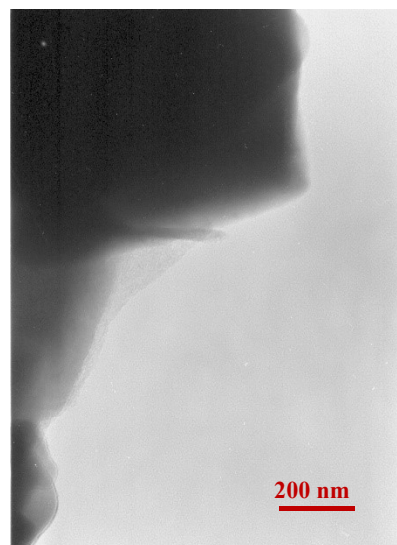

**Figure S4.** pH<sub>final</sub> vs. pH<sub>initial</sub> for mixture of commercial zeolite FAU, FAU/CTABr/ FAU/Lutrol and FAU/Brij.

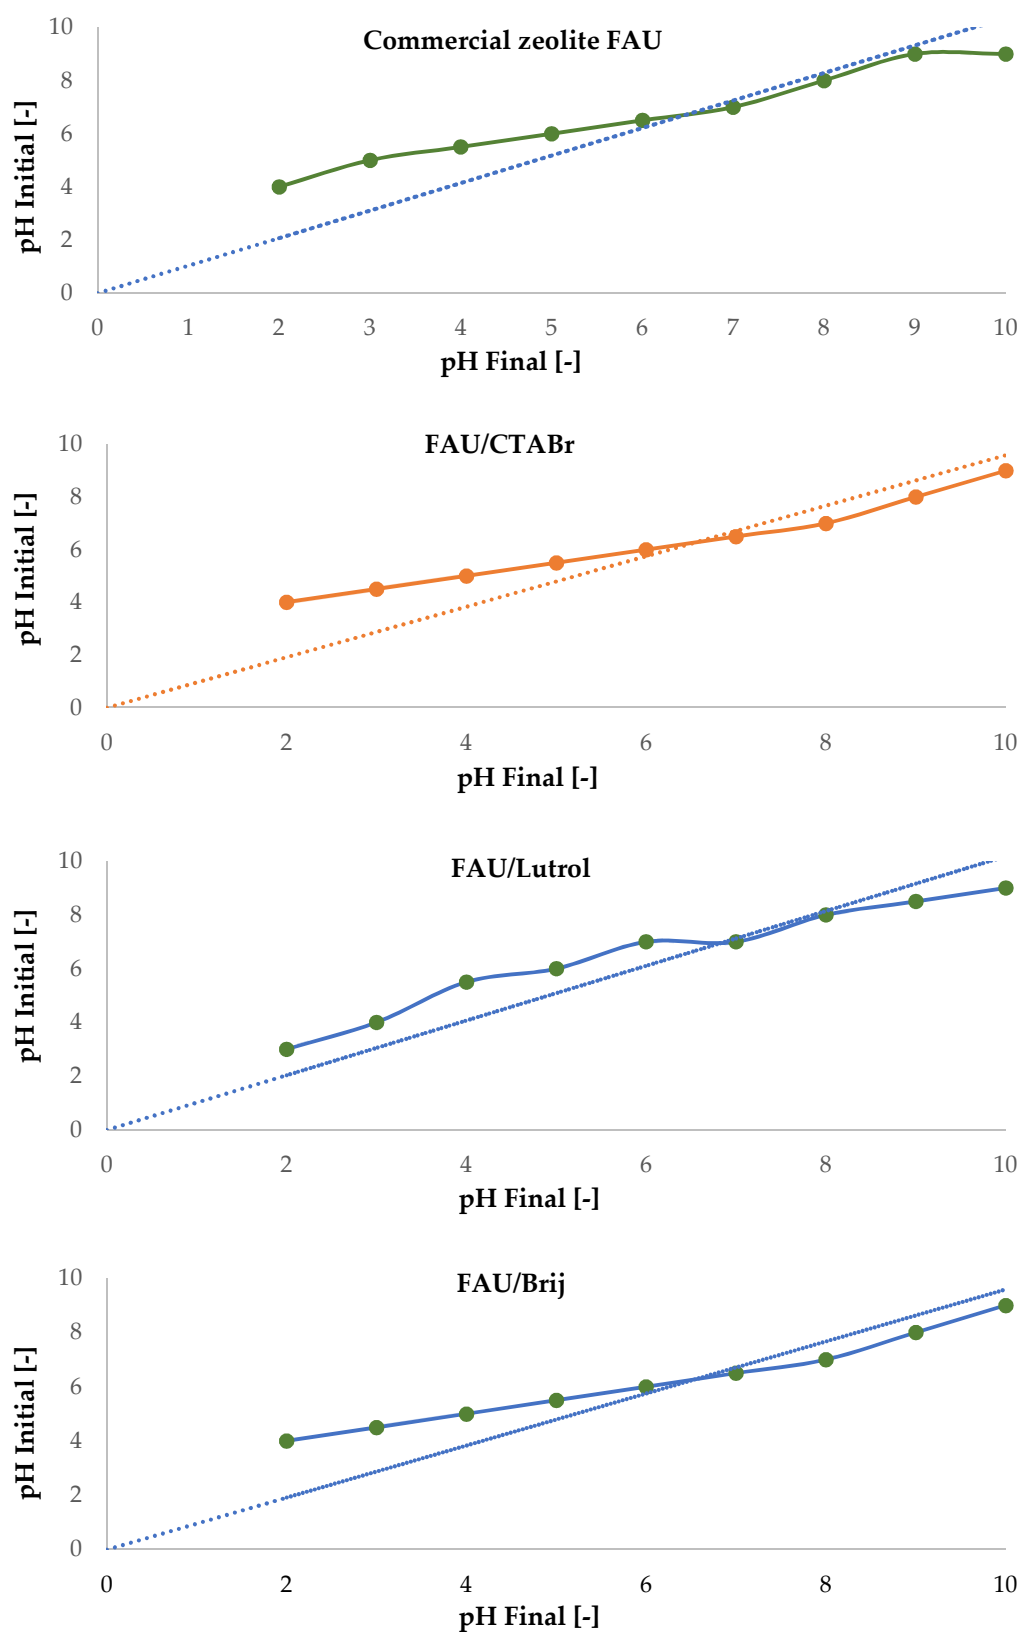

Supplement: s1 [file s1]
